# Supplementary material for: Importance of Meteorological Parameters and Airborne Conidia to Predict Risk of Alternaria on a Potato Crop Ambient Using Machine Learning Algorithms
Source: MDPI journal article supplement (doi:10.3390/s22187063), 2022-09-18
Supplement: s1 [file s1]

## Supplementary information

**Table S1.** Dates of the main phenological phases by growing season. DAE: days after emergence.

|                            | Date (DAE)  |               |             |             |             |
|----------------------------|-------------|---------------|-------------|-------------|-------------|
|                            | 2017        | 2018          | 2019        | 2020        | 2021        |
| <b>Planting</b>            | 22 Apr      | 15 May        | 16 May      | 26 May      | 22 May      |
| <b>Emerging</b>            | 16 May (1)  | 1 Jun (1)     | 4 Jun (1)   | 10 Jun (1)  | 10 Jun (1)  |
| <b>Flowering</b>           | 13 Jun (29) | 4 Jul (34)    | 13 Jul (40) | 13 Jul (34) | 14 Jul (35) |
| <b>Start of senescence</b> | 19 Jul (65) | 15 Aug (76)   | 17 Aug (75) | 14 Aug (66) | 7 Aug (59)  |
| <b>End of senescence</b>   | 12 Aug (89) | 14 Sept (106) | 1 Sept (90) | 31 Aug (83) | 26 Aug (78) |

**Table S2.** Total *Alternaria* conidia by growing season and distribution of conidia in percentage during the main phenological phases.

|                                        | 2017 | 2018 | 2019 | 2020 | 2021 |
|----------------------------------------|------|------|------|------|------|
| <b>Total <i>Alternaria</i> conidia</b> | 7873 | 9264 | 6399 | 2476 | 6444 |
| <i>Alternaria</i> conidia (%)          |      |      |      |      |      |
| <b>Vegetative stage</b>                | 37   | 22   | 21   | 16   | 54   |
| <b>Flowering stage</b>                 | 45   | 49   | 68   | 32   | 25   |
| <b>Senescence stage</b>                | 18   | 29   | 11   | 52   | 21   |

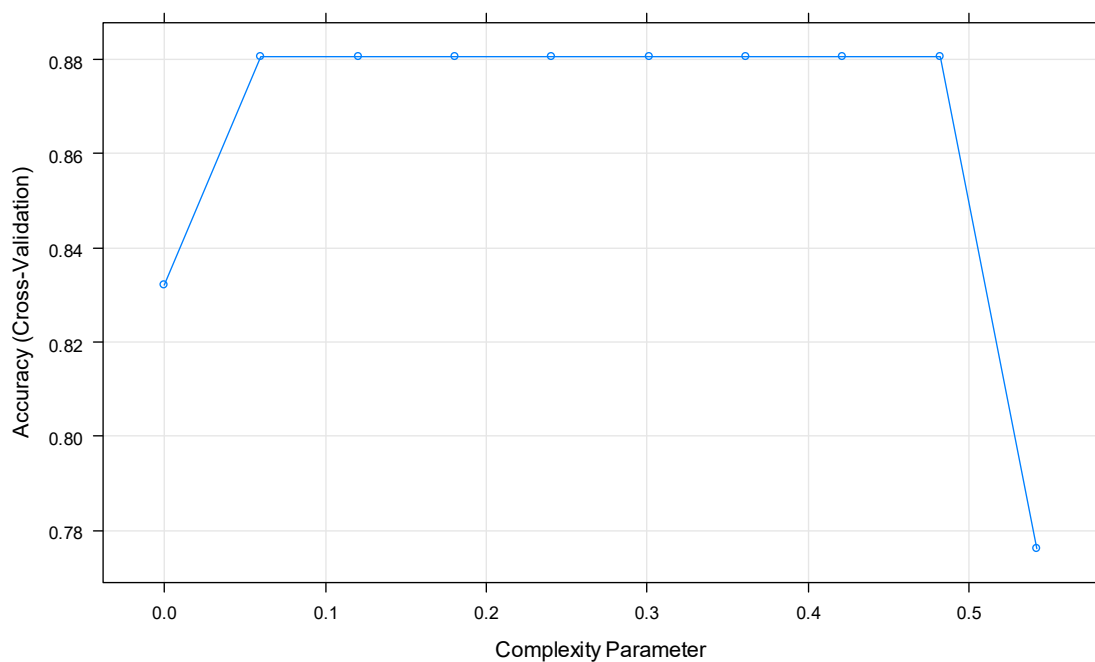

**Figure S1.** Cross-validation to test a range of complexity parameters for the classification and regression tree (CART) model without *Alternaria conidia*.

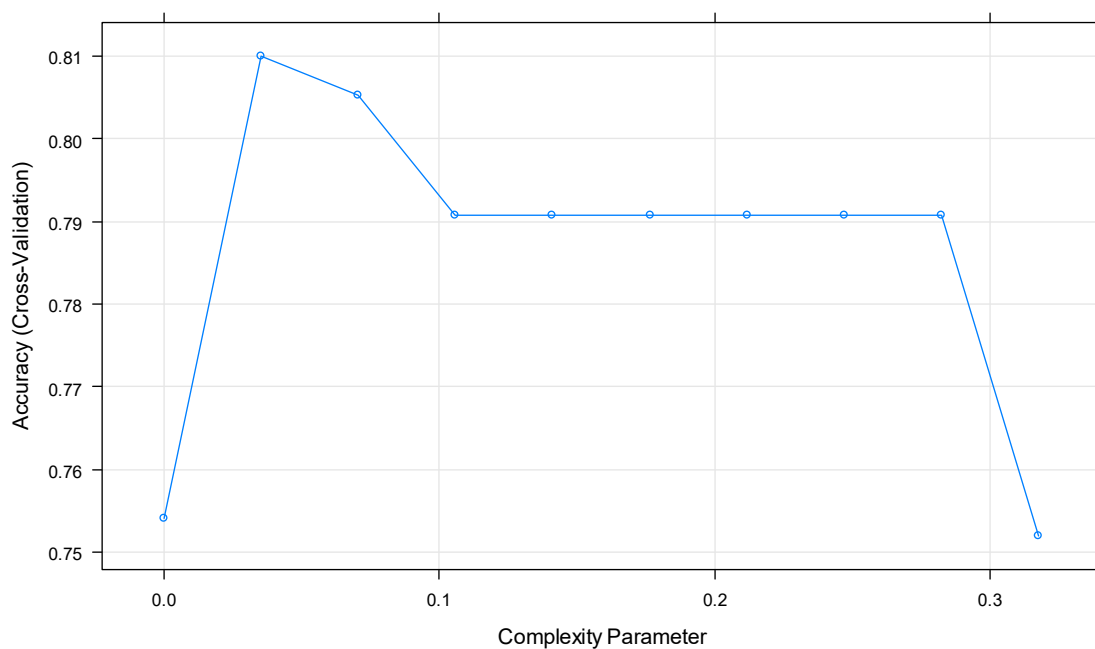

**Figure S2.** Cross-validation to test a range of complexity parameters for the classification and regression tree (CART) model with *Alternaria conidia*.

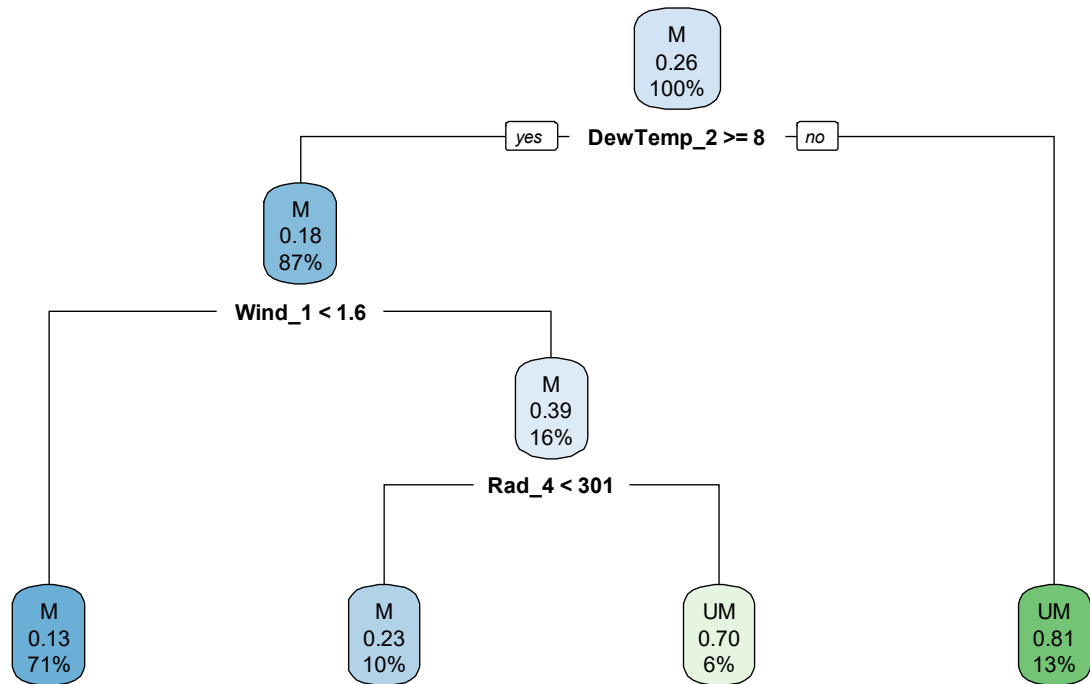

**Figure S3.** A decision tree based on the classification and regression tree (CART) model with the data set without *Alternaria* conidia. UM and M represents meaningful (<10 conidia/m<sup>3</sup>) and meaningful (≥ 10 conidia/m<sup>3</sup>). The weather variables Wind\_1, DewTemp\_2, and Rad\_4, represent wind (on 1 previous day), dew temperature (2 previous days), and solar radiation (4 previous days), respectively.

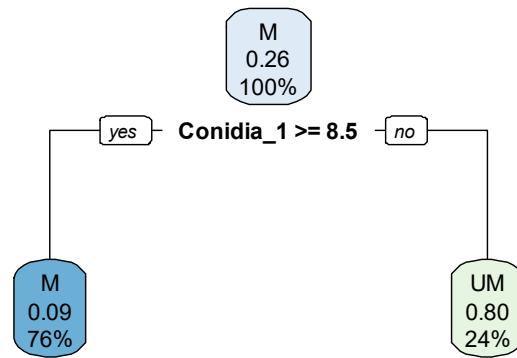

**Figure S4.** A decision tree based on the classification and regression tree (CART) model with the data set with *Alternaria* conidia. UM and M represent meaningful (<10 conidia/m<sup>3</sup>) and meaningful (≥ 10 conidia/m<sup>3</sup>). The weather variable conidia\_1, represent conidia in the immediate past day.

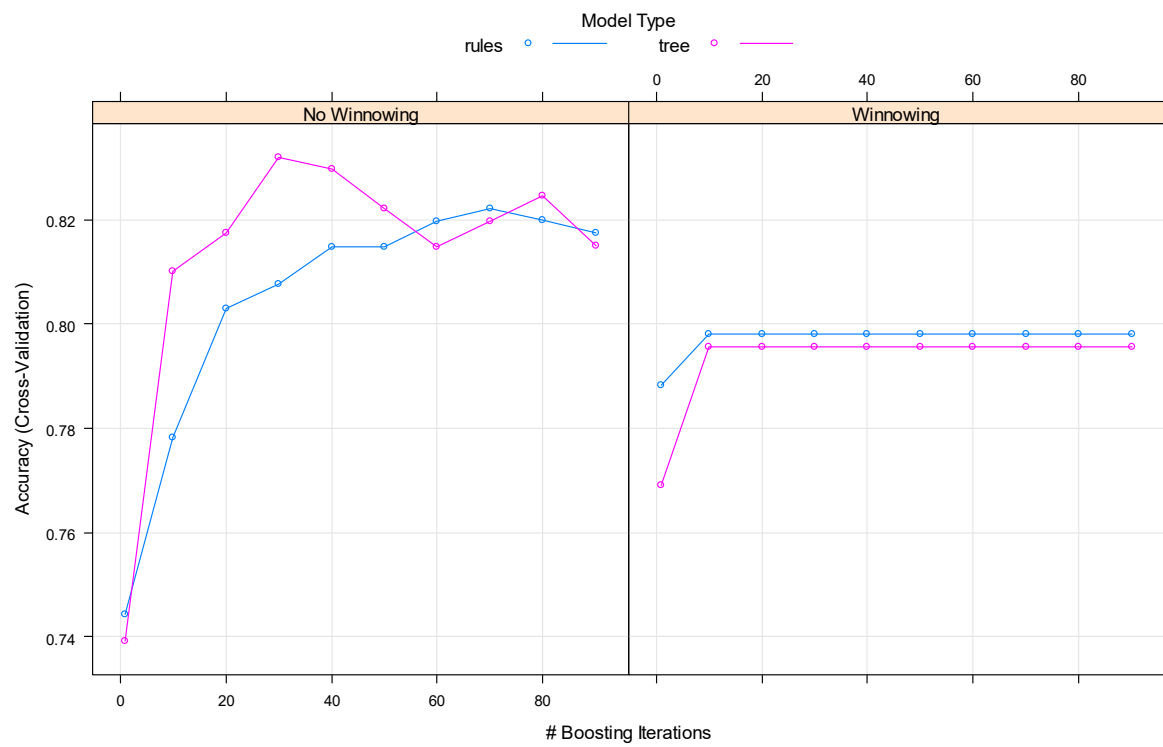

**Figure S5.** Cross-validation for the selection of the best model for the C5.0 decision tree model with the data set without *Alternaria* conidia.

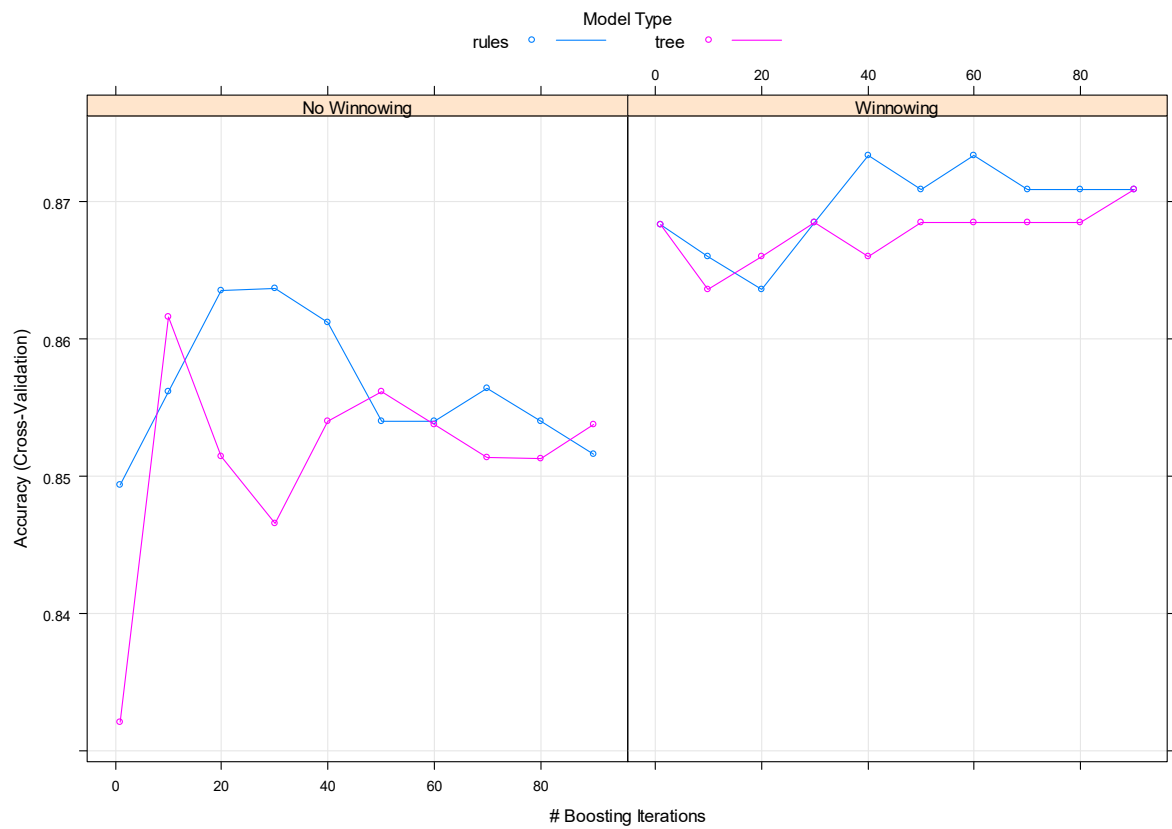

**Figure S6.** Cross-validation for the selection of the best model for the C5.0 decision tree model with the data set with *Alternaria conidia*.

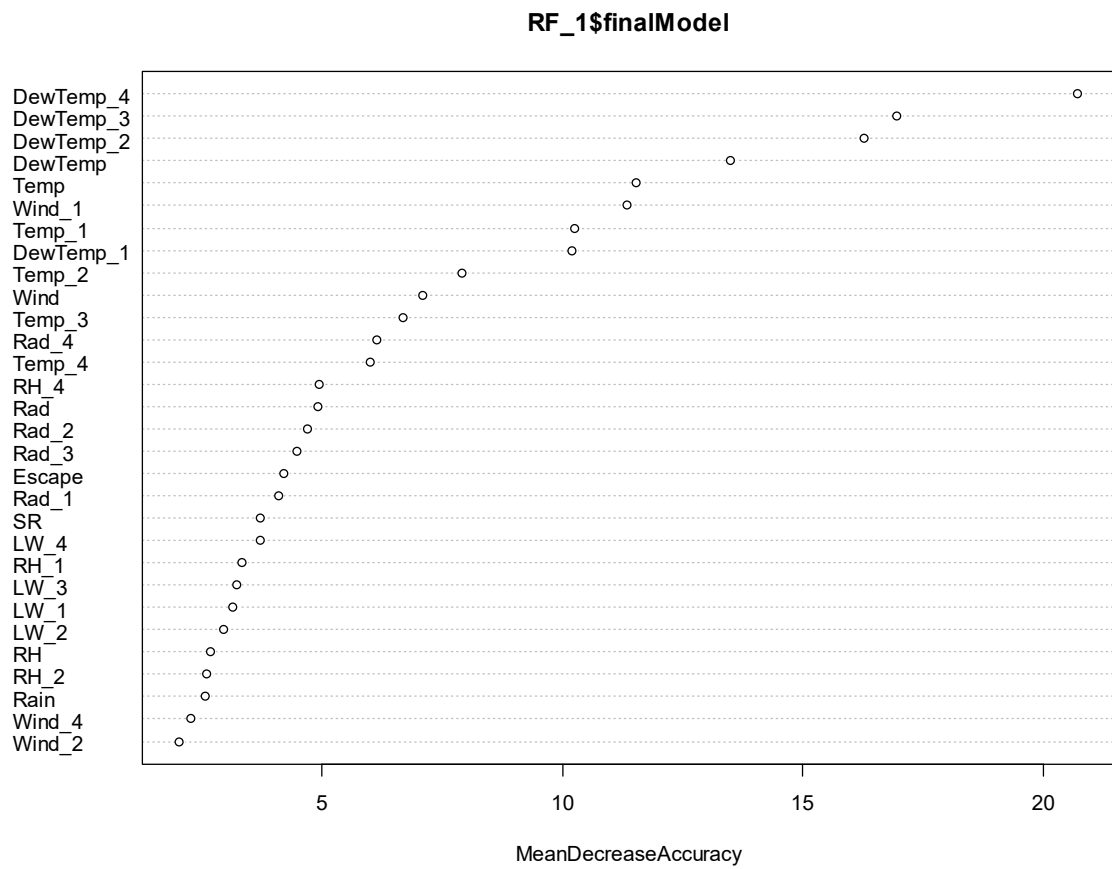

**Figure S7.** The variable of importance from the random forest model with the data set that did not include *Alternaria* conidia.

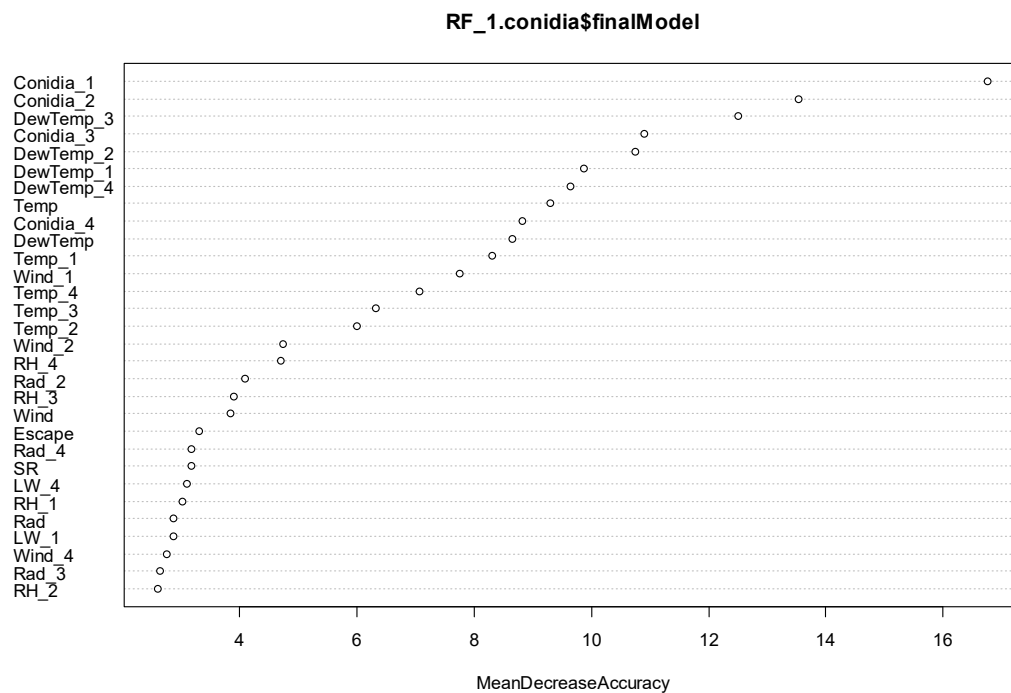

**Figure S8.** The variable of importance from the random forest model with the data set that included *Alternaria* conidia.

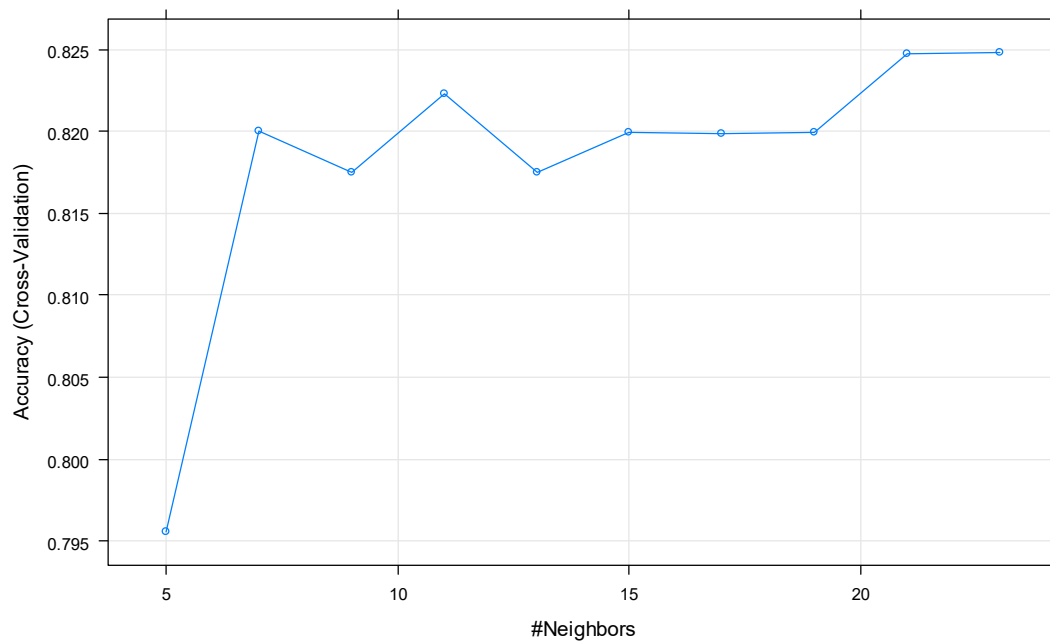

**Figure S9.** Cross-validation to select the optimal number of neighbors in the K-nearest neighbor (KNN) algorithm. The data used here did not include *Alternaria* conidia.



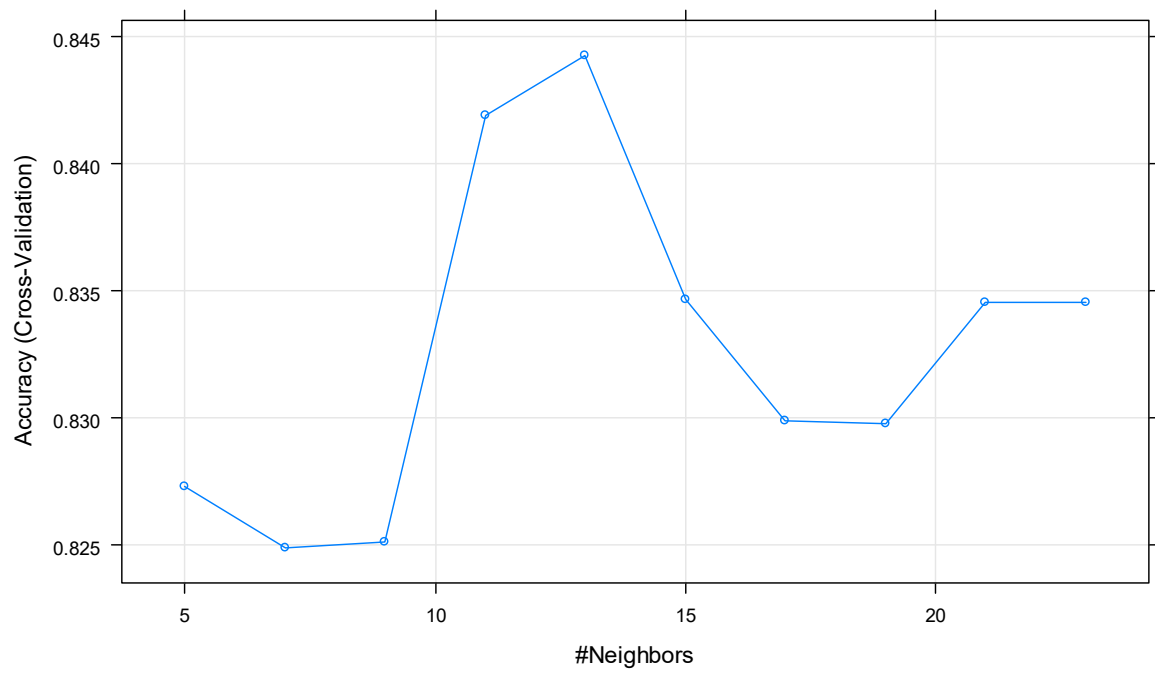

**Figure S10.** Cross-validation to select the optimal number of neighbors in the K-nearest neighbor (KNN) algorithm. The data used here included *Alternaria* conidia.
